# Supplementary material for: In vitro analysis of RQC activities provides insights into the mechanism and function of CAT tailing
Source: eLife journal article supplement (doi:10.7554/elife.27949), 2017-07-18
Supplement: supp [file elife_poa_e27949_Supplementary_File_1.pdf › elife_poa_e27949_Supplementary_File_1.pdf]

Supplementary file 1. *S. cerevisiae* strains used in this study.

| Strain   | Background                               | Plasmid                                 |
|----------|------------------------------------------|-----------------------------------------|
| yBAO2112 | BY4741                                   |                                         |
| yBAO2116 | BY4741 <i>ltn1Δ::ura3</i>                |                                         |
| yBAO2117 | BY4741 <i>rqc1Δ::ura3</i>                |                                         |
| yBAO2118 | BY4741 <i>rqc2Δ::ura3</i>                |                                         |
| yBAO2125 | BY4741 <i>hbs1Δ::ura3</i>                |                                         |
| yBAO2126 | BY4741 <i>dom34Δ::ura3</i>               |                                         |
| yBAO2128 | BY4741 Rqc2p(D98A)                       |                                         |
| yBAO2142 | W303 <i>Δbar1 lys2::HisG pep4::KanMX</i> | pGAL1-Rqc2p-10xHis, HIS3 marker         |
| yBAO2633 | W303 <i>Δbar1 lys2::HisG pep4::KanMX</i> | pGAL1-Rqc2p(D98A)-10xHis, HIS3 marker   |
| yBAO2634 | W303 <i>Δbar1 lys2::HisG pep4::KanMX</i> | pGAL1-Ltn1p-10xHis, HIS3 marker         |
| yBAO2635 | W303 <i>Δbar1 lys2::HisG pep4::KanMX</i> | pGAL1-Ltn1p(W1542E)-10xHis, HIS3 marker |
| yBAO2636 | W303 <i>Δbar1 lys2::HisG pep4::KanMX</i> | pGAL1-Rqc1p-10xHis, HIS3 marker         |
