# Supplementary material for: In vitro analysis of RQC activities provides insights into the mechanism and function of CAT tailing
Source: eLife. 2017 Jul 18;6:e27949. doi: 10.7554/eLife.27949 (PMC5562442; doi:10.7554/eLife.27949)
Supplement: Supplementary file 1. — The names, genetic backgrounds, and protein expression plasmids of the strains generated and used in this study are listed in this table. DOI: http://dx.doi.org/10.7554/eLife.27949.013 [file elife-27949-supp1.xlsx]

## Sheet: Sheet1
Supplementary file 1. S. cerevisiae strains used in this study.
Strain	Background	Plasmid
yBAO2112	BY4741
yBAO2116	BY4741 ltn1Δ::ura3
yBAO2117	BY4741 rqc1Δ::ura3
yBAO2118	BY4741 rqc2Δ::ura3
yBAO2125	BY4741 hbs1Δ::ura3
yBAO2126	BY4741 dom34Δ::ura3
yBAO2128	BY4741 Rqc2p(D98A)
yBAO2142	W303 Δbar1 lys2::HisG pep4::KanMX	pGAL1-Rqc2p-10xHis, HIS3 marker
yBAO2633	W303 Δbar1 lys2::HisG pep4::KanMX	pGAL1-Rqc2p(D98A)-10xHis, HIS3 marker
yBAO2634	W303 Δbar1 lys2::HisG pep4::KanMX	pGAL1-Ltn1p-10xHis, HIS3 marker
yBAO2635	W303 Δbar1 lys2::HisG pep4::KanMX	pGAL1-Ltn1p(W1542E)-10xHis, HIS3 marker
yBAO2636	W303 Δbar1 lys2::HisG pep4::KanMX	pGAL1-Rqc1p-10xHis, HIS3 marker
