# Supplementary figures and images for: In vitro analysis of RQC activities provides insights into the mechanism and function of CAT tailing
Source: eLife journal article supplement (doi:10.7554/elife.27949), 2017-07-18

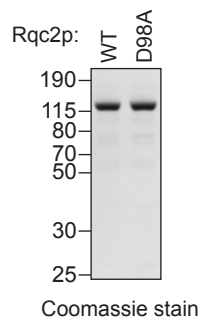

Supplement: supp [file elife_poa_e27949_Figure_1_figure_supplement_1.pdf › elife_poa_e27949_Figure_1_figure_supplement_1.pdf]

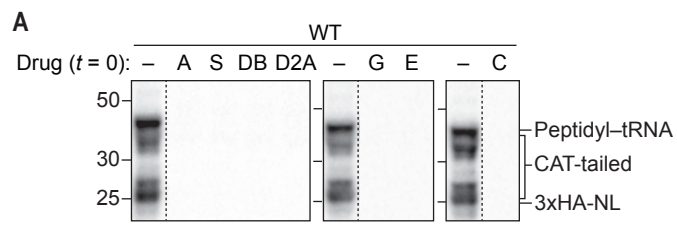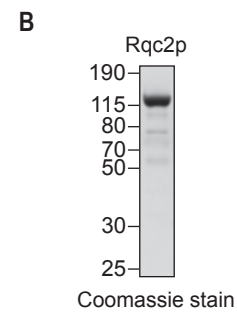

Supplement: supp [file elife_poa_e27949_Figure_2_figure_supplement_1.pdf › elife_poa_e27949_Figure_2_figure_supplement_1.pdf]

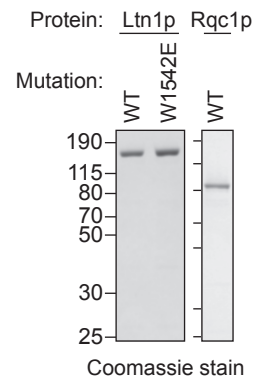

Supplement: supp [file elife_poa_e27949_Figure_4_figure_supplement_1.pdf › elife_poa_e27949_Figure_4_figure_supplement_1.pdf]

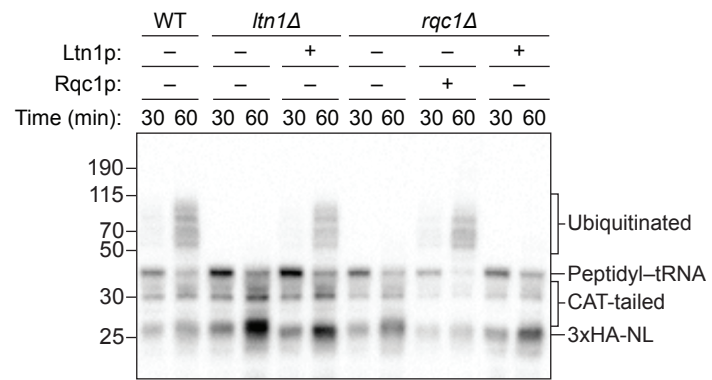

Supplement: supp [file elife_poa_e27949_Figure_4_figure_supplement_2.pdf › elife_poa_e27949_Figure_4_figure_supplement_2.pdf]

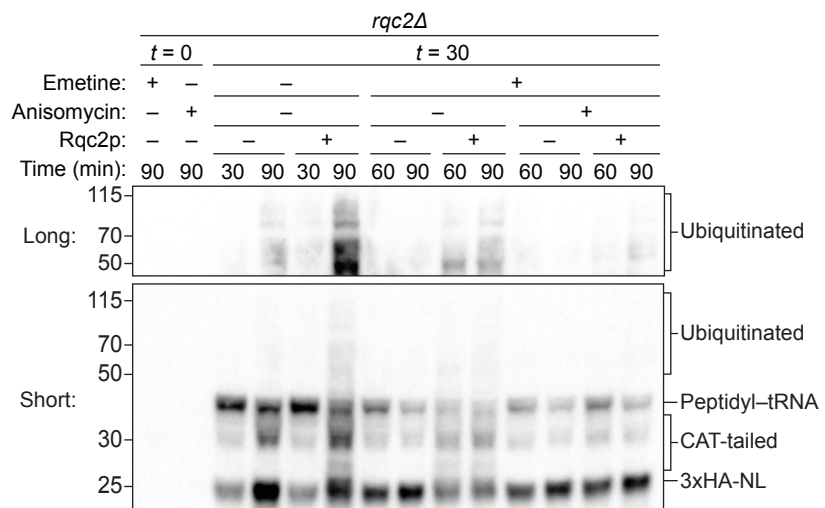

Supplement: supp [file elife_poa_e27949_Figure_4_figure_supplement_3.pdf › elife_poa_e27949_Figure_4_figure_supplement_3.pdf]
